# Supplementary material
Source: publisher figshare collection journal article supplement (https://gsajournals.figshare.com/ndownloader/files/21524748)

**Supplementary Figure FS1** Collinearity between the BTx623 sorghum reference genome and the SNP-based linkage map constructed from the RIL population derived from crossing SC112-14 with PI609251


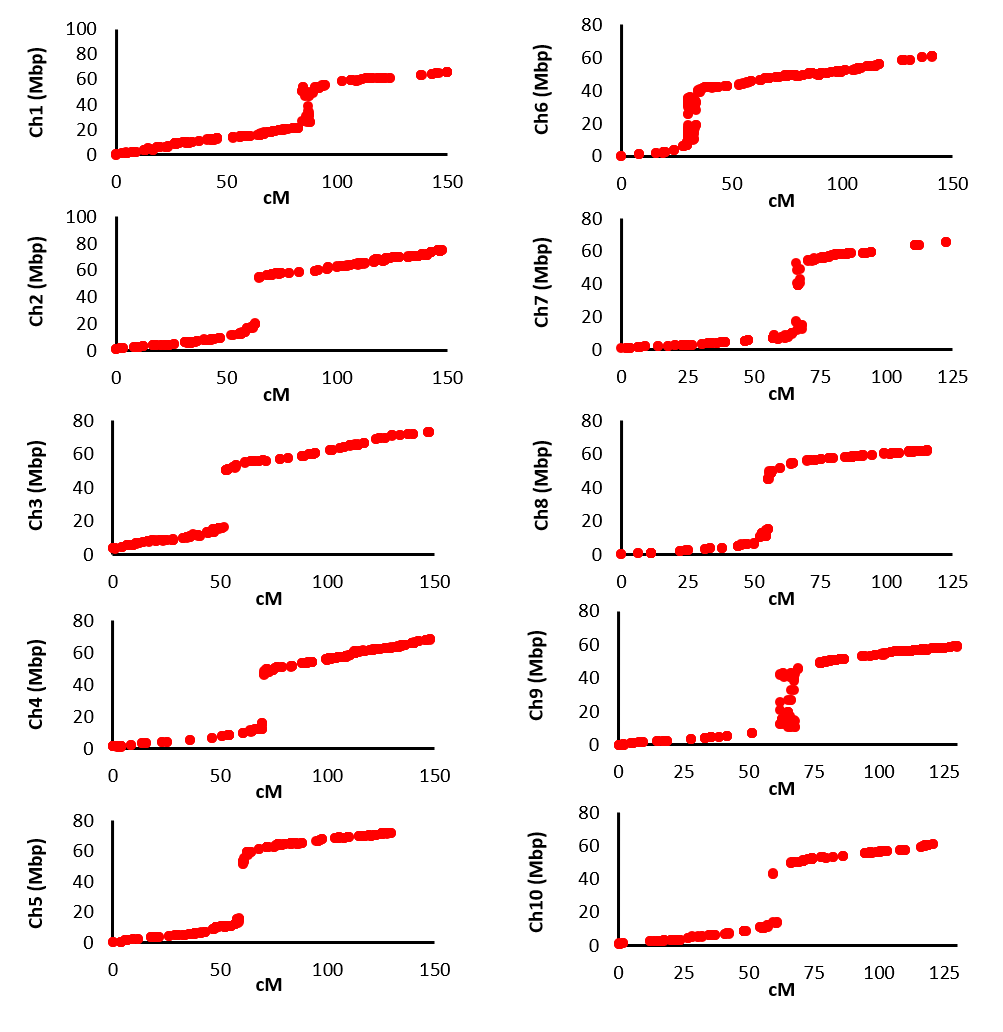

Supplement: Supplementary file 1 [file 21524748]
